# Supplementary material for: Facilitators and Barriers to Implementation of Lung Cancer Screening: A Framework-Driven Systematic Review
Source: PubMed Central journal article supplement — J Natl Cancer Inst. 2022 Aug 22;114(11):1449–67. doi: 10.1093/jnci/djac154 (PMC9664175; doi:10.1093/jnci/djac154), 2022-08-22
Supplement: djac154_supplementary_data.pdf [file djac154_supplementary_data.pdf]

**Supplementary Table 1.** Quality appraisal of included studies using the modified Mixed Methods Appraisal Tool (MMAT): Quantitative Studies

|                                                                                             | Cataldo, et al. 2016 (4) | Copeland, et al. 2019 (5) | Coughlin 2020 (6) | Duong, et al. 2017 (9) | Eberth, et al. 2014 (11) | Eberth, et al. 2018 (10) | Ersek, et al. 2016 (12) | Hall, et al. 2018 (13) | Henderson, et al. 2017 (14) | Henderson, et al. 2019 (15) | Iaccarino, et al. 2015 (17) | Khairy, et al. 2018 (19) | Leng, et al. 2020 (20) | Lewis, et al. 2019 (21) | Li, et al. 2020 (22) | Lillie, et al. 2017 (23) | Monu, et al. 2020 (26) | Mukthinuthalapati, et al. 2020 (27) | Rajupet, et al. 2017 (29) | Randhawa, et al. 2018 (30) | Raz et al. (31) | Williams, et al. (37) |
|---------------------------------------------------------------------------------------------|--------------------------|---------------------------|-------------------|------------------------|--------------------------|--------------------------|-------------------------|------------------------|-----------------------------|-----------------------------|-----------------------------|--------------------------|------------------------|-------------------------|----------------------|--------------------------|------------------------|-------------------------------------|---------------------------|----------------------------|-----------------|-----------------------|
| S1. Are there clear research questions?                                                     | Y                        | Y                         | Y                 | Y                      | Y                        | Y                        | Y                       | Y                      | Y                           | Y                           | Y                           | Y                        | Y                      | Y                       | Y                    | Y                        | Y                      | Y                                   | Y                         | Y                          | Y               | Y                     |
| S2. Do the collected data allow to address the research questions?                          | Y                        | Y                         | Y                 | Y                      | Y                        | Y                        | Y                       | Y                      | Y                           | Y                           | Y                           | Y                        | Y                      | Y                       | Y                    | Y                        | Y                      | Y                                   | Y                         | Y                          | Y               | Y                     |
| 4.1. Is the sampling strategy relevant to address the research question?                    | Y                        | Y                         | N                 | Y                      | Y                        | Y                        | Y                       | Y                      | Y                           | Y                           | Y                           | Y                        | Y                      | Y                       | Y                    | Y                        | Y                      | NS                                  | Y                         | NS                         | Y               | Y                     |
| 4.2. Are the qualitative data collection methods adequate to address the research question? | Y                        | N<br>S                    | N<br>S            | Y                      | Y                        | Y                        | N                       | Y                      | Y                           | Y                           | Y                           | NS                       | Y                      | Y                       | Y                    | NS                       | N                      | NS                                  | NS                        | NS                         | Y               | NS                    |
| 4.3. Are the measurements appropriate?                                                      | Y                        | N<br>S                    | Y                 | Y                      | Y                        | Y                        | Y                       | Y                      | Y                           | Y                           | Y                           | Y                        | Y                      | Y                       | Y                    | Y                        | Y                      | Y                                   | Y                         | Y                          | Y               | Y                     |
| 4.4. Is the risk of nonresponse bias low?                                                   | Y                        | N<br>S                    | N<br>S            | Y                      | Y                        | Y                        | Y                       | Y                      | Y                           | Y                           | Y                           | Y                        | Y                      | Y                       | NS                   | Y                        | NS                     | NS                                  | NS                        | NS                         | NS              | NS                    |
| 4.5. Is the statistical analysis appropriate to answer the research question?               | Y                        | N<br>S                    | Y                 | NS                     | NS                       | Y                        | Y                       | Y                      | Y                           | Y                           | Y                           | Y                        | Y                      | Y                       | Y                    | Y                        | Y                      | Y                                   | Y                         | NS                         | Y               | Y                     |

**Abbreviations:** Y=Yes; N=No; NS=Not Sure

**Supplementary Table 2.** Quality appraisal of included studies using the modified Mixed Methods Appraisal Tool (MMAT): Qualitative Studies

|                                                                                                    | Ahsan, et al. 2019 (1) | Allen, et al. 2020 (2) | Carter-Harris & Gould. 2017 (3) | Dukes, et al. 2020 (8) | Hoffman, et al. 2015 (16) | Kanodra, et al. 2016 (18) | Mishra, et al. 2016 (25) | Roth, et al. 2018 (32) | Simmons, et al. 2017 (33) | Sin, et al. 2016 (34) | Watson, et al. 2021 (36) |
|----------------------------------------------------------------------------------------------------|------------------------|------------------------|---------------------------------|------------------------|---------------------------|---------------------------|--------------------------|------------------------|---------------------------|-----------------------|--------------------------|
| S1. Are there clear research questions?                                                            | Y                      | Y                      | Y                               | Y                      | Y                         | Y                         | Y                        | Y                      | Y                         | Y                     | Y                        |
| S2. Do the collected data allow to address the research questions?                                 | Y                      | Y                      | Y                               | Y                      | Y                         | Y                         | Y                        | Y                      | Y                         | Y                     | Y                        |
| 1.1. Is the qualitative approach appropriate to answer the research question?                      | Y                      | Y                      | Y                               | Y                      | Y                         | Y                         | Y                        | Y                      | Y                         | Y                     | Y                        |
| 1.2. Are the qualitative data collection methods adequate to address the research question?        | Y                      | Y                      | Y                               | Y                      | Y                         | Y                         | Y                        | Y                      | Y                         | Y                     | Y                        |
| 1.3. Are the findings adequately derived from the data?                                            | Y                      | Y                      | Y                               | Y                      | Y                         | Y                         | Y                        | Y                      | Y                         | Y                     | Y                        |
| 1.4. Is the interpretation of results sufficiently substantiated by data?                          | Y                      | Y                      | Y                               | Y                      | Y                         | Y                         | Y                        | Y                      | Y                         | Y                     | Y                        |
| 1.5. Is there coherence between qualitative data sources, collection, analysis and interpretation? | Y                      | Y                      | Y                               | N                      | Y                         | Y                         | N                        | N                      | N                         | N                     | Y                        |

**Abbreviations:** Y=Yes; N=No; NS=Not Sure

**Supplementary Table 3.** Quality appraisal of included studies using the modified Mixed Methods Appraisal Tool (MMAT): Mixed Methods Studies

|                                                                                                                         | Draucker, et al. 2019 (7) | McDonnell, et al. 2019 (24) | Qiu, et al. 2016 (28) | Tseng, et al. 2019 (35) |
|-------------------------------------------------------------------------------------------------------------------------|---------------------------|-----------------------------|-----------------------|-------------------------|
| S1. Are there clear research questions?                                                                                 | Y                         | Y                           | Y                     | Y                       |
| S2. Do the collected data allow to address the research questions?                                                      | Y                         | Y                           | Y                     | Y                       |
| 5.1. Is there an adequate rationale for using a mixed methods design to address the research question                   | Y                         | Y                           | Y                     | Y                       |
| 5.2. Are the different components of the study effectively integrated to answer the research question?                  | Y                         | Y                           | Y                     | Y                       |
| 5.3. Are the outputs of the integration of qualitative and quantitative components adequately interpreted?              | Y                         | Y                           | Y                     | Y                       |
| 5.4. Are divergences and inconsistencies between quantitative and qualitative results adequately addressed              | Y                         | Y                           | Y                     | Y                       |
| 5.5. Do the different components of the study adhere to the quality criteria of each tradition of the methods involved? | Y                         | Y                           | Y                     | Y                       |

**Abbreviations:** Y=Yes; N=No; NS=Not Sure

## REFERENCES

1. Ahsan, A., et al. (2019). "Examining Lung Cancer Screening Behaviors in the Primary Care Setting: A Mixed Methods Approach." *Journal of cancer treatment and research* 7(1): 1.
2. Allen, C. G., et al. (2020). "Successes and challenges of implementing a lung cancer screening program in federally qualified health centers: a qualitative analysis using the Consolidated Framework for Implementation Research." *Translational Behavioral Medicine* 11(5): 1088-1098.
3. Carter-Harris, L. and Gould, M.K. (2017). "Multilevel barriers to the successful implementation of lung cancer screening: why does it have to be so hard?" *Annals of the American Thoracic Society* 14(8): 1261-1265.
4. Cataldo, J. K. (2016). "High-risk older smokers' perceptions, attitudes, and beliefs about lung cancer screening." *Cancer medicine* 5(4): 753-759.
5. Copeland, A., et al. (2019). "Effectiveness of lung cancer screening implementation in the community setting in the United States." *Journal of Oncology Practice* 15(7): e607-e615.
6. Coughlin, J. M., et al. (2020). "Understanding barriers to lung cancer screening in primary care." *Journal of Thoracic Disease* 12(5): 2536.
7. Draucker, C. B., et al. (2019). "Understanding the decision to screen for lung cancer or not: A qualitative analysis." *Health Expectations* 22(6): 1314-1321.
8. Dukes, K., et al. (2020). "Attitudes of Clinicians about Screening Head and Neck Cancer Survivors for Lung Cancer Using Low-Dose Computed Tomography." *Annals of Otology, Rhinology & Laryngology* 129(1): 23-31.
9. Duong, D. K., et al. (2017). "Patient and primary care provider attitudes and adherence towards lung cancer screening at an academic medical center." *Preventive medicine reports* 6: 17-22.
10. Eberth, J. M., et al. (2018). "A national survey of primary care physicians: perceptions and practices of low-dose CT lung cancer screening." *Preventive medicine reports* 11: 93-99.
11. Eberth, J. M., et al. (2014). "Computed tomography screening for lung cancer: a survey of Society of Thoracic Radiology members." *Journal of thoracic imaging* 29(5): 289-292.
12. Ersek, J. L., et al. (2016). "Knowledge of, attitudes toward, and use of low-dose computed tomography for lung cancer screening among family physicians." *Cancer* 122(15): 2324-2331.
13. Hall, D. L., et al. (2018). "Lung cancer screening uncertainty among patients undergoing LDCT." *American journal of health behavior* 42(1): 69-76.
14. Henderson, L. M., et al. (2017). "Opinions, practice patterns, and perceived barriers to lung cancer screening among attending and resident primary care physicians." *Risk management and healthcare policy* 10: 189.
15. Henderson, L. M., et al. (2019). "Opinions and practices of lung cancer screening by physician specialty." *North Carolina medical journal* 80(1): 19-26.
16. Hoffman, R., et al. (2019). "Attitudes and beliefs of primary care providers in new mexico about lung cancer screening using low-dose computed tomography (vol 16, 150112e, 2019)." *Preventing chronic disease* 16.
17. Iaccarino, J. M., et al. (2015). "A national survey of pulmonologists' views on low-dose computed tomography screening for lung cancer." *Annals of the American Thoracic Society* 12(11): 1667-1675.
18. Kanodra, N. M., et al. (2016). "Primary care provider and patient perspectives on lung cancer screening. A qualitative study." *Annals of the American Thoracic Society* 13(11): 1977-1982.
19. Khairy, M., et al. (2018). "An analysis of lung cancer screening beliefs and practice patterns for community providers compared to academic providers." *Cancer Control* 25(1): 1073274818806900.
20. Leng, J., et al. (2020). "Primary Care Providers' Knowledge, Attitudes, Beliefs, and Practice Related to Lung Cancer Screening in Five High-Risk Communities in New York City." *Journal of Cancer Education*: 1-10.
21. Lewis, J. A., et al. (2019). "Low provider knowledge is associated with less evidence-based lung cancer screening." *Journal of the National Comprehensive Cancer Network* 17(4): 339-346.
22. Li, C.-C., et al. (2020). "Adaptation and Preliminary Evaluation of a Lung Cancer Screening Decision Tool for Older Chinese American Populations." *Journal of the National Medical Association* 112(4): 433-444.
23. Lillie, S. E., et al. (2017). "What factors do patients consider most important in making lung cancer screening decisions? Findings from a demonstration project conducted in the Veterans Health Administration." *Lung Cancer* 104: 38-44.
24. McDonnell, K. K., et al. (2019). "Lung cancer screening: Practice guidelines and insurance coverage are not enough." *Journal of the American Association of Nurse Practitioners* 31(1): 33.
25. Mishra, S. I., et al. (2016). "Peer reviewed: Patient perspectives on low-dose computed tomography for lung cancer screening, New Mexico, 2014." *Preventing chronic disease* 13.
26. Monu, J., et al. (2020). "Evaluating knowledge, attitudes, and beliefs about lung cancer screening using crowdsourcing." *Chest* 158(1): 386-392.
27. Mukthinuthalapati, V. P. K., et al. (2020). "Knowledge, Attitudes, and Practices Pertaining to Lung Cancer Screening Among Primary Care Physicians in a Public Urban Health Network." *Clinical lung cancer* 21(5): 450-454.

28. Qiu, R., Copeland, Amy, Sercy, Erica, Porter, Nancy R (2016). "Planning and implementation of low-dose computed tomography lung cancer screening programs in the United States." *Clinical journal of oncology nursing* 20(1): 52.
29. Rajupet, S., et al. (2017). "Attitudes about lung cancer screening: primary care providers versus specialists." *Clinical lung cancer* 18(6): e417-e423.
30. Randhawa, S., et al. (2018). "Lung cancer screening in the community setting: Challenges for adoption." *The American Surgeon* 84(9): 1415-1421.
31. Raz, D. J., et al. (2019). "Perceptions and utilization of lung cancer screening among smokers enrolled in a tobacco cessation program." *Clinical lung cancer* 20(1): e115-e122.
32. Roth, J. A., et al. (2018). "A qualitative study exploring patient motivations for screening for lung cancer." *PLoS One* 13(7): e0196758.
33. Simmons, V. N., et al. (2017). "High-risk community and primary care providers knowledge about and barriers to low-dose computed tomography lung cancer screening." *Lung Cancer* 106: 42-49.
34. Sin, M.-K., et al. (2016). "Sociocultural barriers to lung cancer screening among Korean immigrant men." *Journal of community health* 41(4): 790-797.
35. Tseng, T.-S., et al. (2019). "Knowledge and attitudes towards low dose computed tomography lung cancer screening and smoking among African Americans—a mixed method study." *Transl Cancer Res* 8: S431-442.
36. Watson, L., et al. (2021). "Implementation of a Lung Cancer Screening Program in Two Federally Qualified Health Centers." *Public Health Reports*: 0033354920971717.
37. Williams, R. M., et al. (2020). "Lung cancer screening decisional needs among African American smokers of lower socioeconomic status." *Ethnicity & Health*: 1-19.
